# Supplementary material
Source: publisher figshare collection journal article supplement (https://acs.figshare.com/ndownloader/files/5736759)
Supplement: Supplementary file 1 [file 5736759]

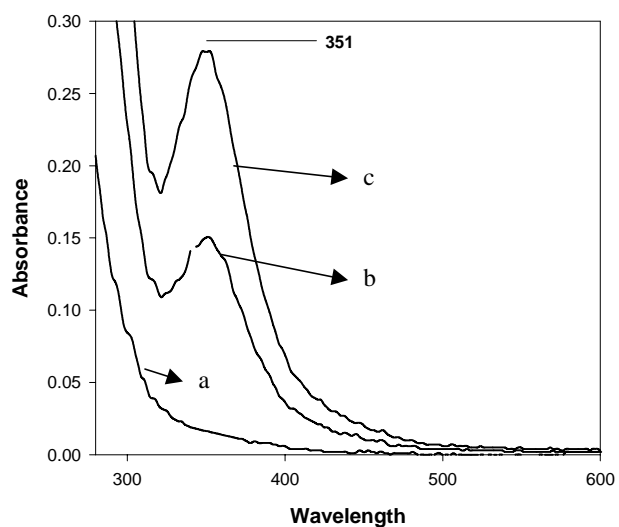

**Figure S1.** Electronic absorption spectra obtained during the determination of the concentration of  $\text{H}_2\text{O}_2$  accumulated while bubbling  $\text{O}_2$  through a solution containing 0.25 mM hydrazine at 25 °C. The blank (a) was obtained from a freshly prepared solution of hydrazine (see text), whereas spectra (b) and (c) were obtained from solutions of hydrazine bubbled with  $\text{O}_2$  for 1.0 and 2.5 h, respectively.
